# Supplementary material for: Chemical Constituents of Euphorbia stracheyi Boiss (Euphorbiaceae)
Source: MDPI journal article supplement (doi:10.3390/metabo13070852), 2023-07-15
Supplement: s1 [file s1]

## Supporting Information

# Chemical constituents of *Euphorbia stracheyi* Boiss (Euphorbiaceae)

Hui Zhu <sup>1,2</sup>, Xiangxiang Ren <sup>1,2</sup>, Tao Su <sup>1</sup> and Lei Yang <sup>2,\*</sup>

Co-Innovation Center for Sustainable Forestry in Southern China, College of Biology and the Environment, Nanjing Forestry University, Nanjing 210037, China,  
zh8201711509@njfu.edu.cn, renxiangxiang@njfu.edu.cn, sutao@njfu.edu.cn  
Shanghai Key Laboratory of Plant Functional Genomics and Resources, Shanghai Chenshan Botanical Garden, Shanghai, 201602, China

\* Correspondence: leiyang@cemps.ac.cn; Tel.: 86-21-37792288

## Contents of Supporting Information

|                                                                                                            |                    |
|------------------------------------------------------------------------------------------------------------|--------------------|
| <b>Figure S1.</b> $^1\text{H}$ NMR ( $\text{CDCl}_3$ ) spectrum of compound <b>1</b>                       | 3                  |
| <b>Figure S2.</b> $^{13}\text{C}$ NMR ( $\text{CDCl}_3$ ) spectrum of compound <b>1</b> .....              | 3                  |
| <b>Figure S3.</b> DEPT135 NMR ( $\text{CDCl}_3$ ) spectrum of compound <b>1</b>                            | 4                  |
| <b>Figure S4.</b> DEPT90 NMR ( $\text{CDCl}_3$ ) spectrum of compound <b>1</b>                             | 4                  |
| <b>Figure S5.</b> HSQC ( $\text{CDCl}_3$ ) spectrum of compound <b>1</b> .....                             | 5                  |
| <b>Figure S6.</b> $^1\text{H}$ - $^1\text{H}$ COSY ( $\text{CDCl}_3$ ) spectrum of compound <b>1</b> ..... | 5                  |
| <b>Figure S7.</b> HMBC ( $\text{CDCl}_3$ ) spectrum of compound <b>1</b> .....                             | 6                  |
| <b>Figure S8.</b> ROESY ( $\text{CDCl}_3$ ) spectrum of compound <b>1</b> .....                            | 6                  |
| <b>Figure S9.</b> HRESIMS spectrum of compound <b>1</b> .....                                              | 7                  |
| <b>Figure S10.</b> IR spectrum of compound <b>1</b> .....                                                  | 7                  |
| <b>Figure S11.</b> UV spectrum of compound <b>1</b> .....                                                  | 8                  |
| <b>Figure S12.</b> $^1\text{H}$ NMR ( $\text{CDCl}_3$ ) spectrum of compound <b>2</b> .....                | 8                  |
| <b>Figure S13.</b> $^{13}\text{C}$ NMR ( $\text{CDCl}_3$ ) spectrum of compound <b>2</b>                   | 9                  |
| <b>Figure S14.</b> $^1\text{H}$ NMR ( $\text{CDCl}_3$ ) spectrum of compound <b>3</b>                      | 9                  |
| <b>Figure S15.</b> $^{13}\text{C}$ NMR ( $\text{CDCl}_3$ ) spectrum of compound <b>3</b>                   | <a href="#">10</a> |
| <b>Figure S16.</b> $^1\text{H}$ NMR ( $\text{CDCl}_3$ ) spectrum of compound <b>4</b> .....                | <a href="#">10</a> |
| <b>Figure S17.</b> $^{13}\text{C}$ NMR ( $\text{CDCl}_3$ ) spectrum of compound <b>4</b>                   | <a href="#">11</a> |
| <b>Figure S18.</b> $^1\text{H}$ NMR ( $\text{CDCl}_3$ ) spectrum of compound <b>5</b>                      | <a href="#">11</a> |
| <b>Figure S19.</b> $^{13}\text{C}$ NMR ( $\text{CDCl}_3$ ) spectrum of compound <b>5</b>                   | <a href="#">12</a> |
| <b>Figure S20.</b> $^1\text{H}$ NMR ( $\text{CDCl}_3$ ) spectrum of compound <b>6</b> .....                | <a href="#">12</a> |
| <b>Figure S21.</b> $^{13}\text{C}$ NMR ( $\text{CDCl}_3$ ) spectrum of compound <b>6</b>                   | <a href="#">13</a> |
| <b>Figure S22.</b> $^1\text{H}$ NMR ( $\text{CDCl}_3$ ) spectrum of compound <b>7</b>                      | <a href="#">13</a> |
| <b>Figure S23.</b> $^{13}\text{C}$ NMR ( $\text{CDCl}_3$ ) spectrum of compound <b>7</b>                   | <a href="#">14</a> |
| <b>Figure S24.</b> $^1\text{H}$ NMR ( $\text{CDCl}_3$ ) spectrum of compound <b>8</b> .....                | <a href="#">14</a> |
| <b>Figure S25.</b> $^{13}\text{C}$ NMR ( $\text{CDCl}_3$ ) spectrum of compound <b>8</b>                   | <a href="#">15</a> |
| <b>Figure S26.</b> $^1\text{H}$ NMR ( $\text{CDCl}_3$ ) spectrum of compound <b>9</b>                      | <a href="#">15</a> |
| <b>Figure S27.</b> $^{13}\text{C}$ NMR ( $\text{CDCl}_3$ ) spectrum of compound <b>9</b>                   | <a href="#">16</a> |
| <b>Figure S28.</b> $^1\text{H}$ NMR ( $\text{CD}_3\text{OD}$ ) spectrum of compound <b>10</b> .....        | <a href="#">16</a> |
| <b>Figure S29.</b> $^{13}\text{C}$ NMR ( $\text{CD}_3\text{OD}$ ) spectrum of compound <b>10</b>           | <a href="#">17</a> |
| <b>Figure S30.</b> $^1\text{H}$ NMR ( $\text{CD}_3\text{OD}$ ) spectrum of compound <b>11</b>              | <a href="#">17</a> |
| <b>Figure S31.</b> $^{13}\text{C}$ NMR ( $\text{CD}_3\text{OD}$ ) spectrum of compound <b>11</b>           | <a href="#">18</a> |
| <b>Table S1.</b> Crystal data and structure refinement for compound <b>1</b> .....                         | <a href="#">19</a> |
| <b>Table S2.</b> Cytotoxicity data of compounds <b>1-11</b> at the concentration of 40 $\mu\text{M}$       | 20                 |

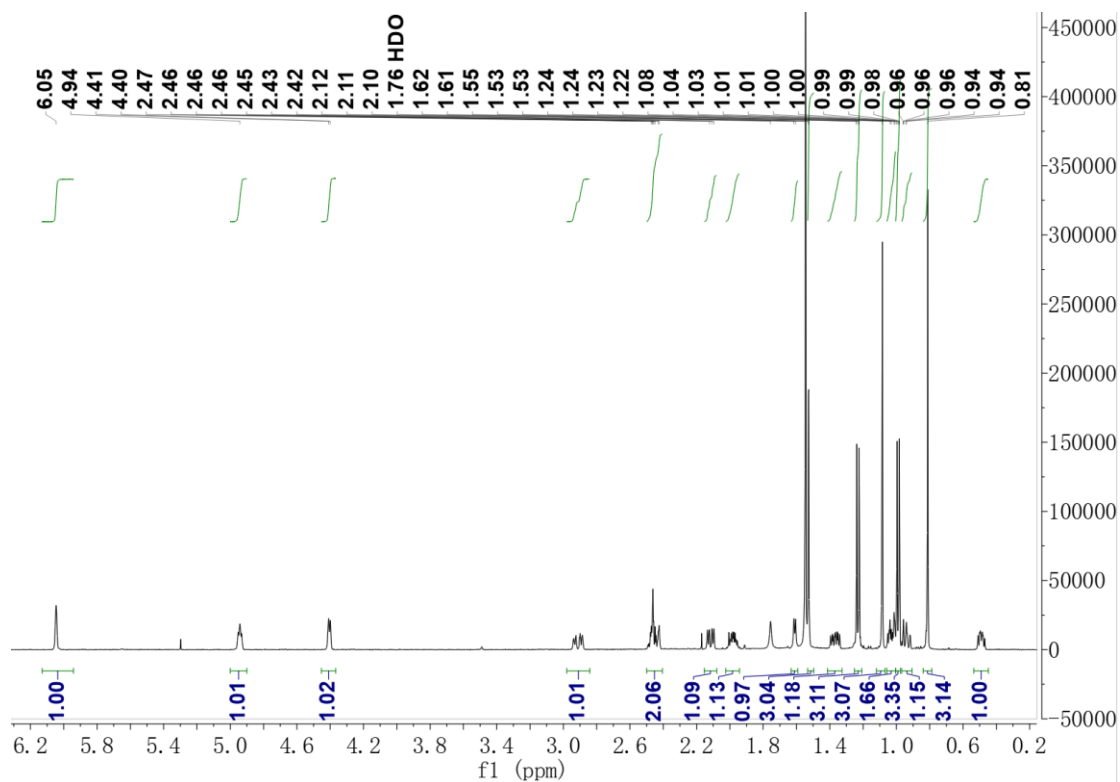

**Figure S1.** <sup>1</sup>H NMR (CDCl<sub>3</sub>) spectrum of compound **1**

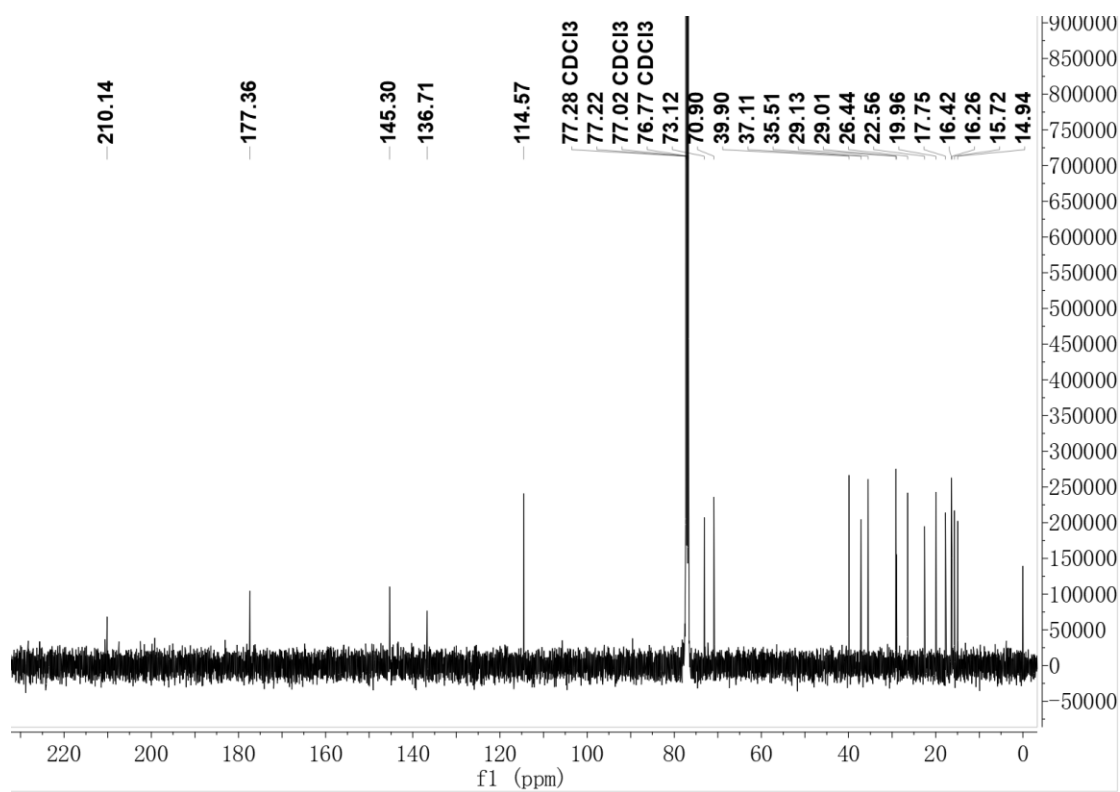

**Figure S2.** <sup>13</sup>C NMR (CDCl<sub>3</sub>) spectrum of compound **1**

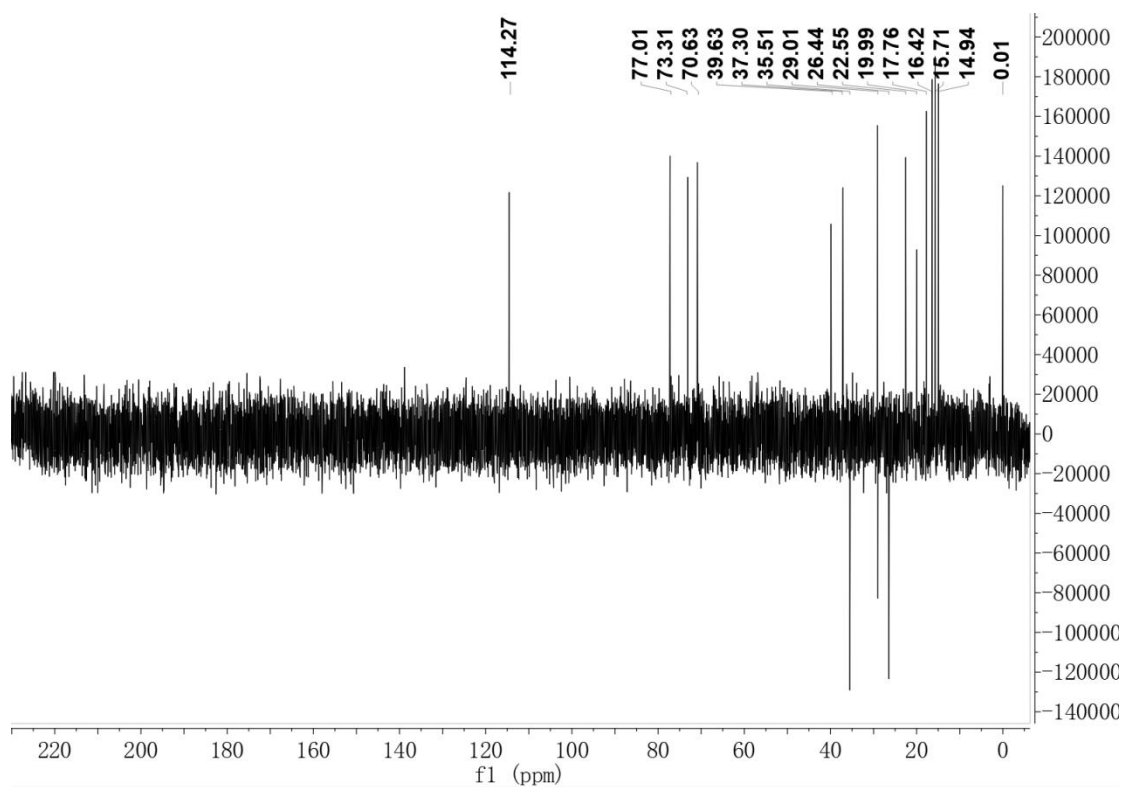

**Figure S3.** DEPT135 NMR (CDCl<sub>3</sub>) spectrum of compound **1**

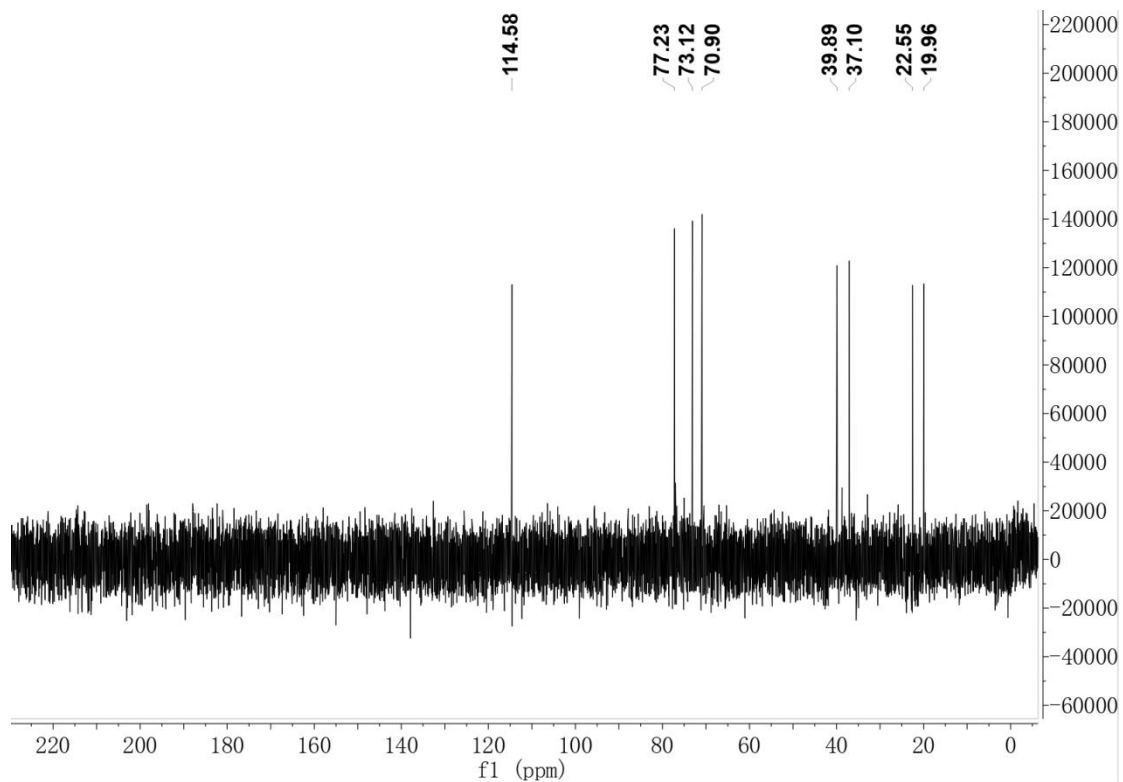

**Figure S4.** DEPT90 NMR (CDCl<sub>3</sub>) spectrum of compound **1**

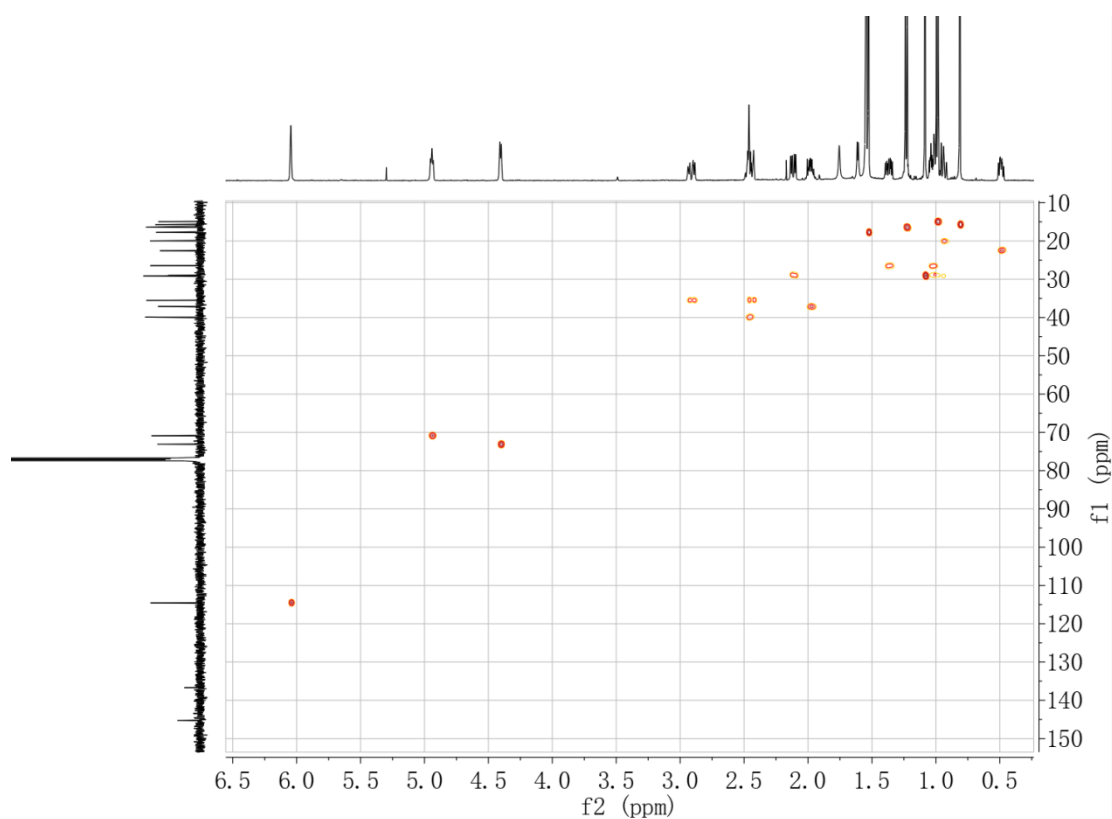

**Figure S5.** HSQC (CDCl<sub>3</sub>) spectrum of compound **1**

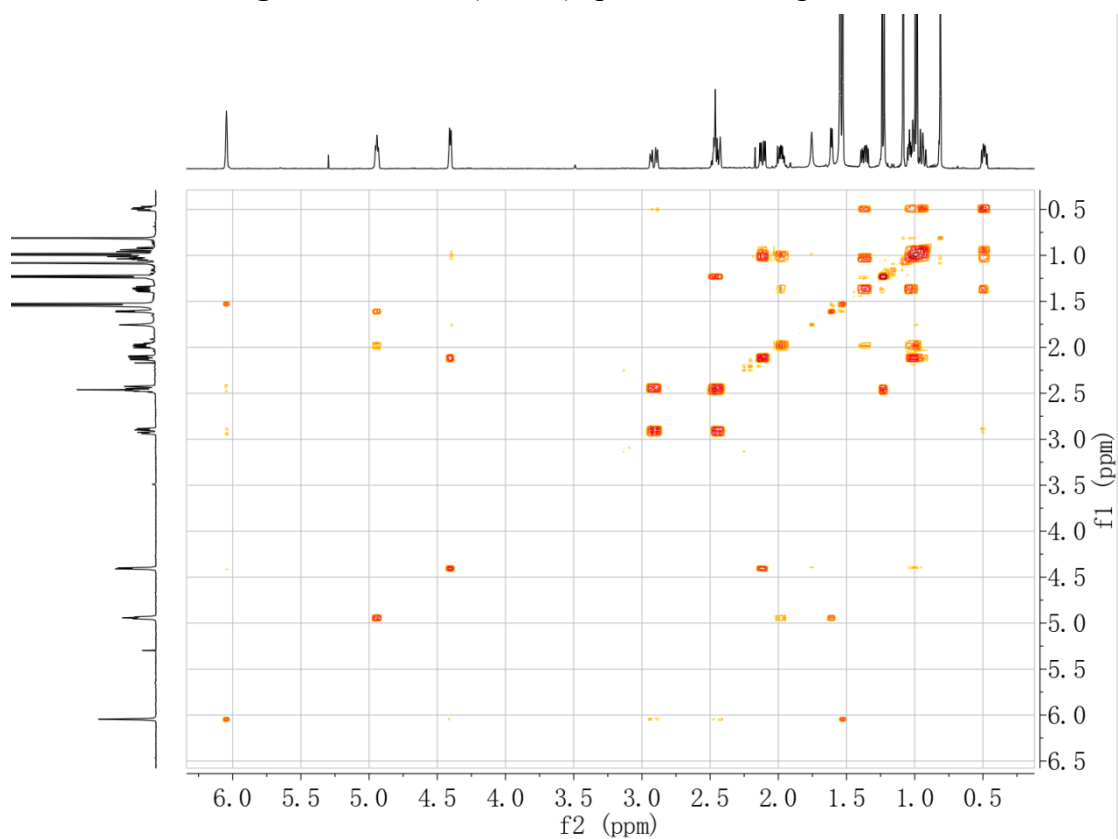

**Figure S6.** <sup>1</sup>H-<sup>1</sup>H COSY (CDCl<sub>3</sub>) spectrum of compound **1**

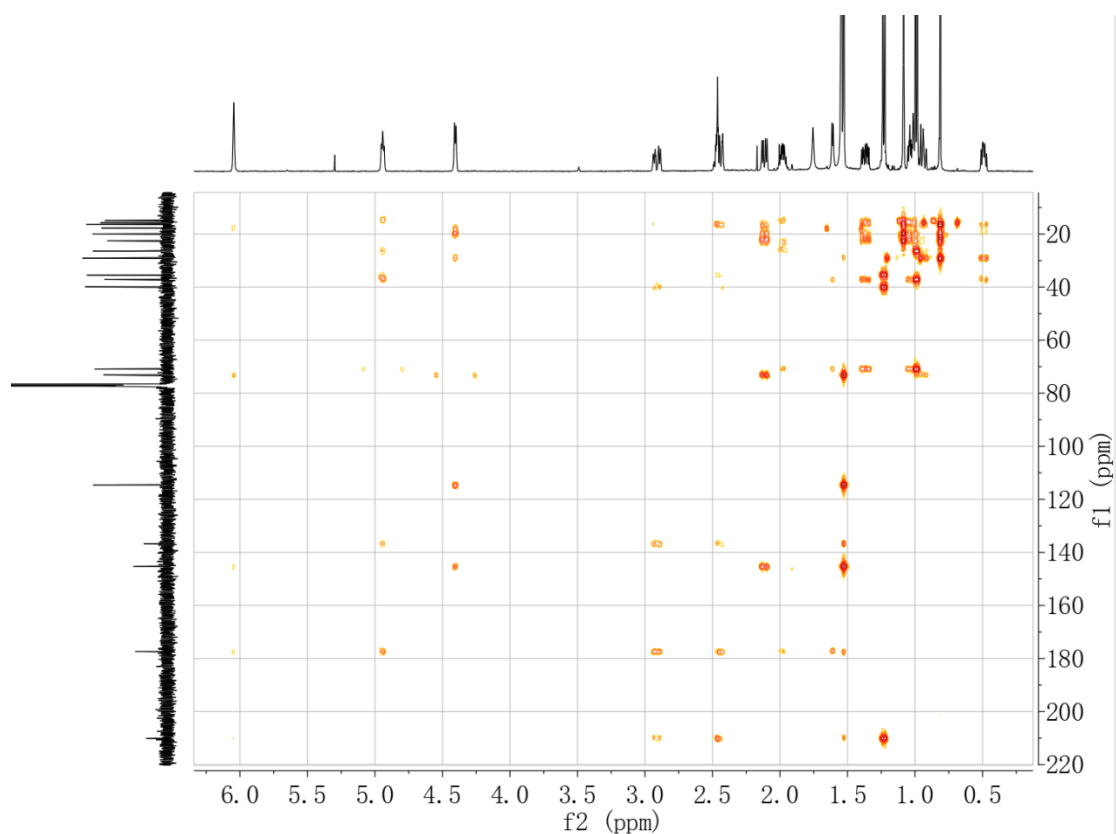

**Figure S7.** HMBC (CDCl<sub>3</sub>) spectrum of compound **1**

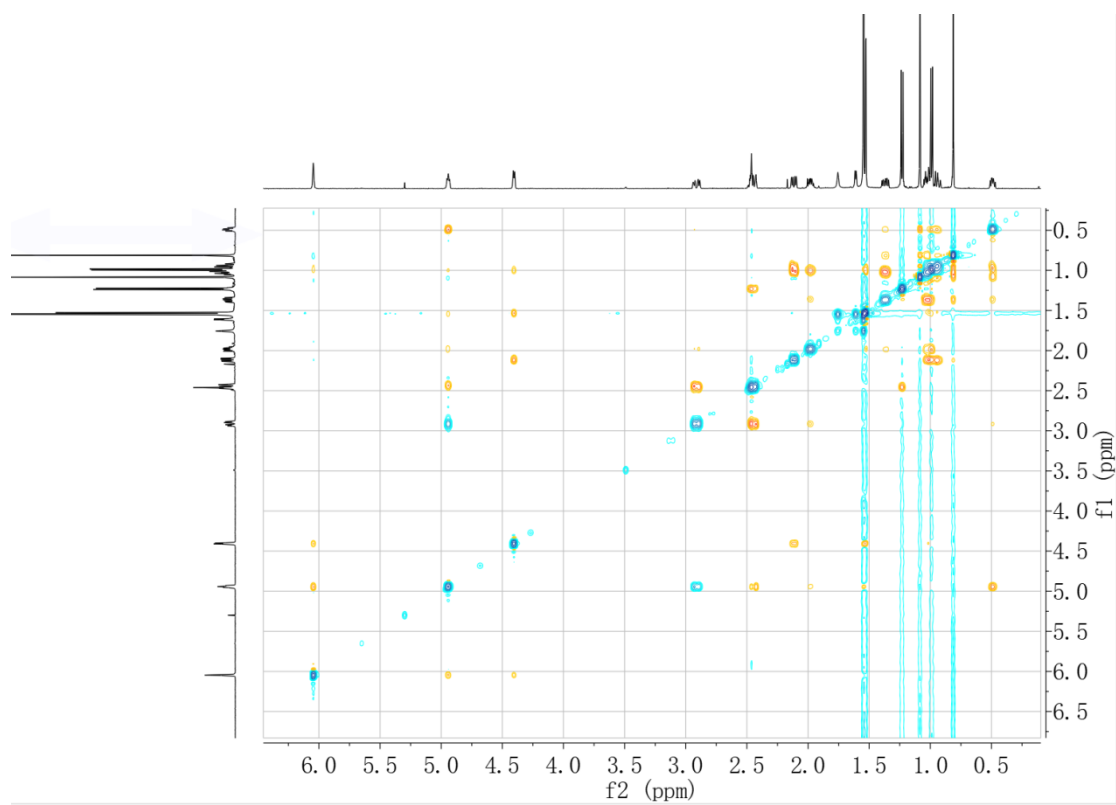

**Figure S8.** ROESY (CDCl<sub>3</sub>) spectrum of compound **1**

## User Spectra

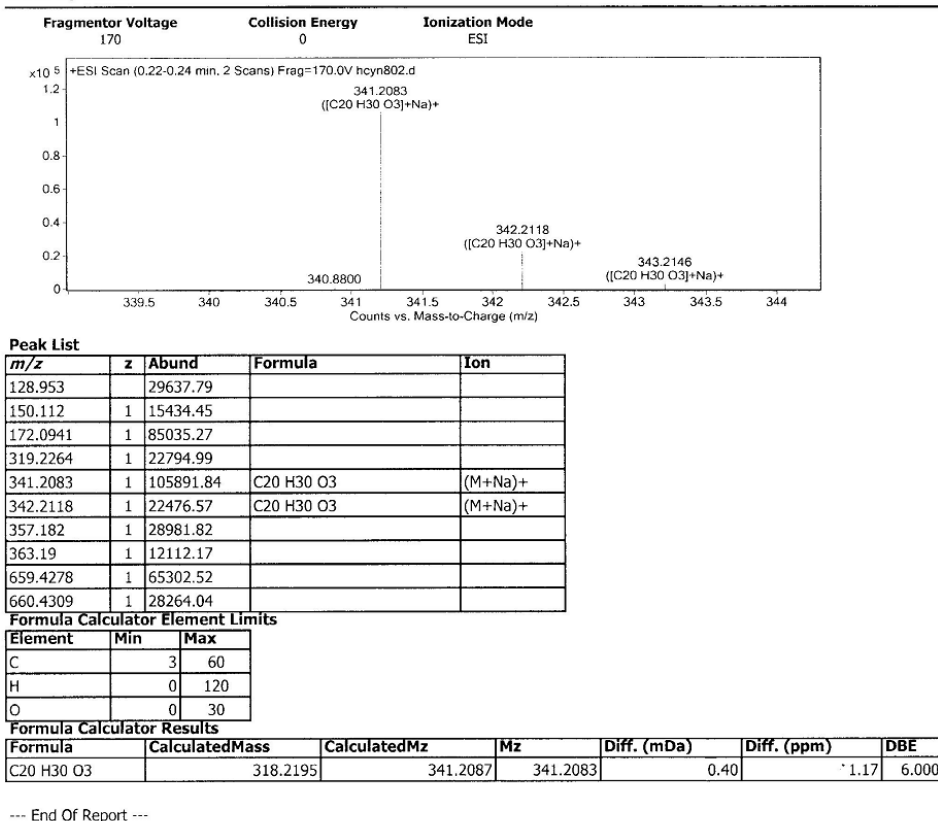

Figure S9. HRESIMS spectrum of compound 1

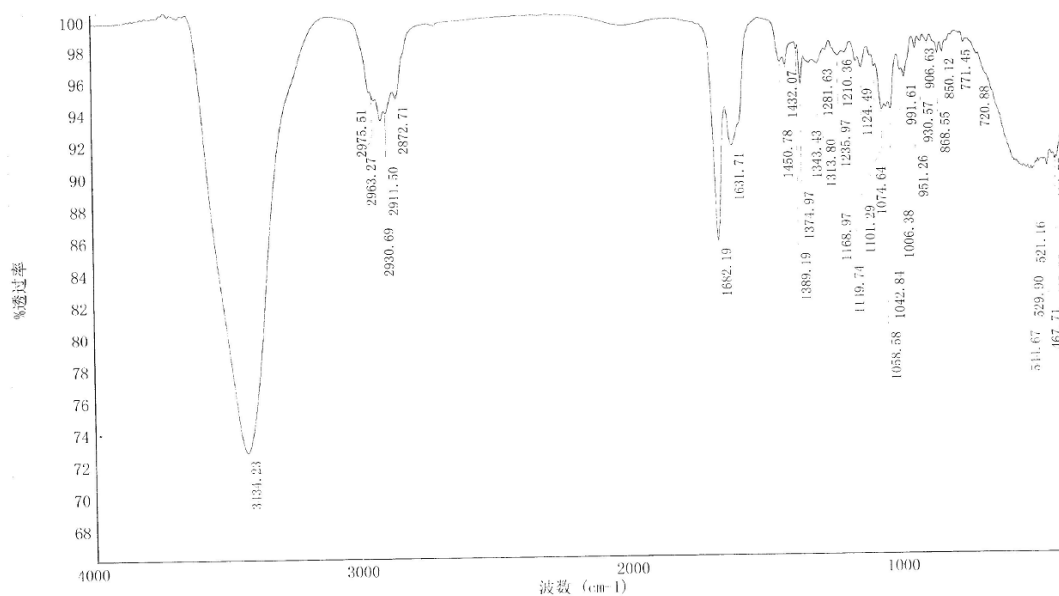

Figure S10. IR spectrum of compound 1

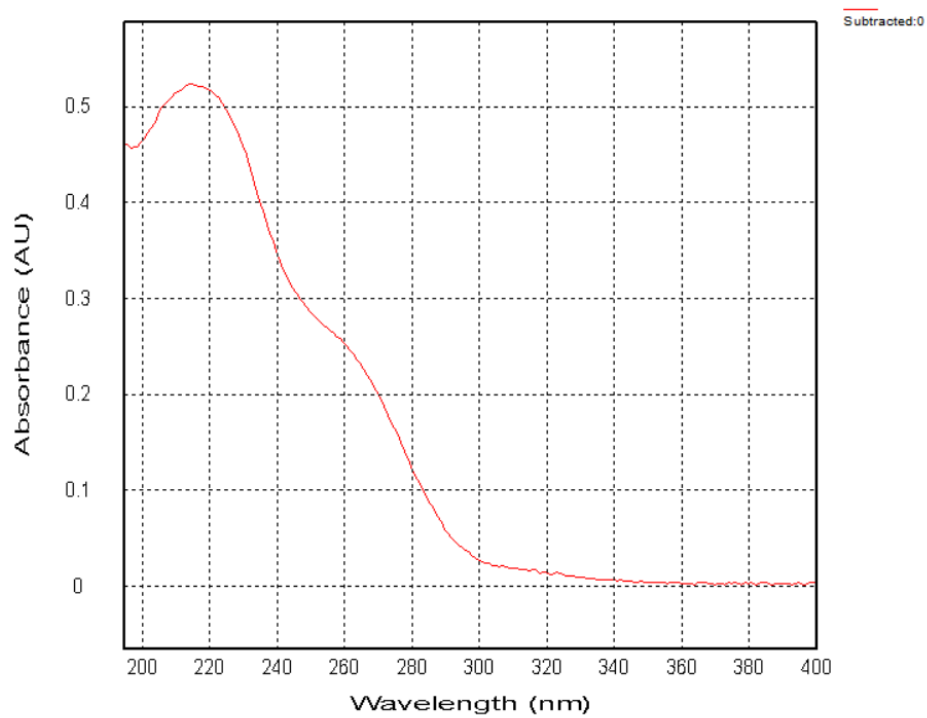

**Figure S11.** UV spectrum of compound **1**

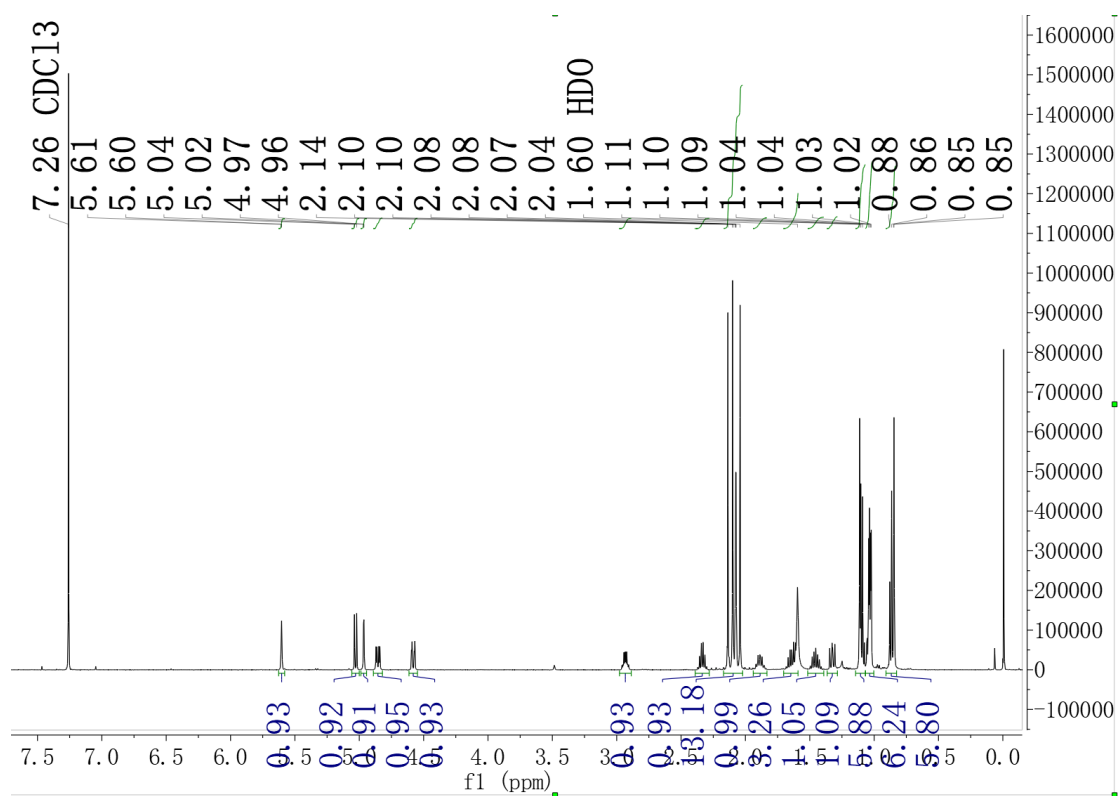

**Figure S12.**  $^1\text{H}$  NMR ( $\text{CDCl}_3$ ) spectrum of compound **2**



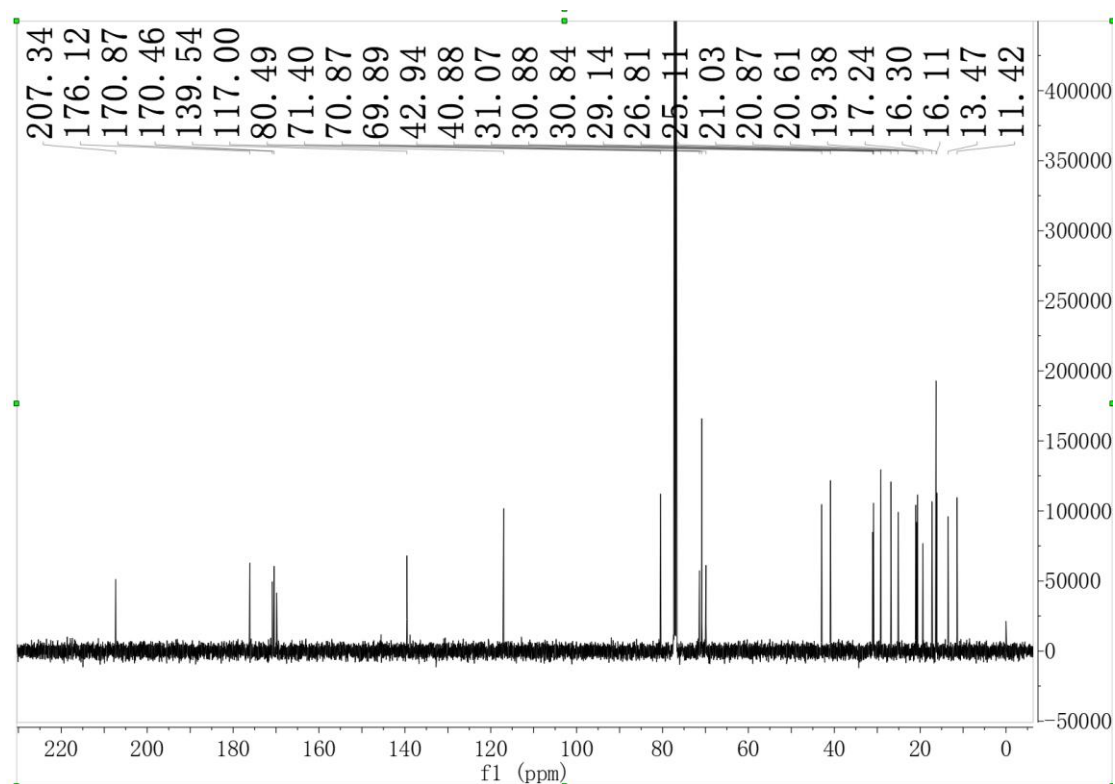

**Figure S13.** <sup>13</sup>C NMR (CDCl<sub>3</sub>) spectrum of compound **2**

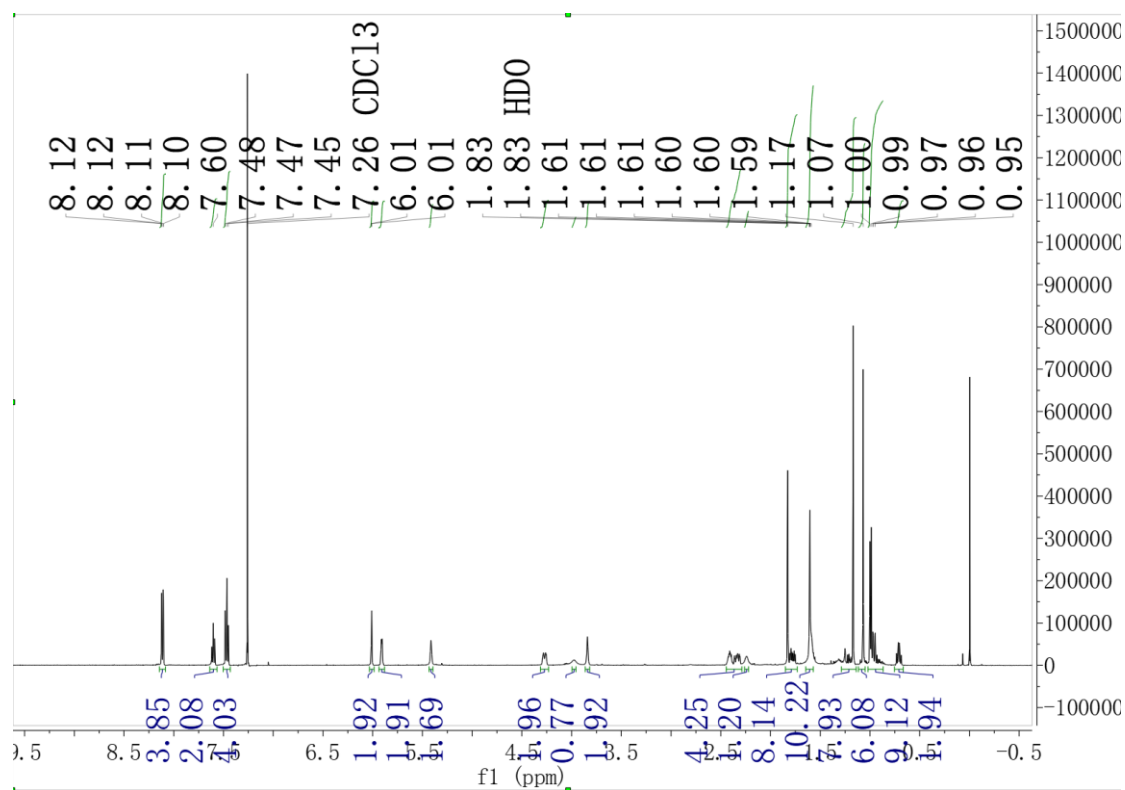

**Figure S14.** <sup>1</sup>H NMR (CDCl<sub>3</sub>) spectrum of compound **3**

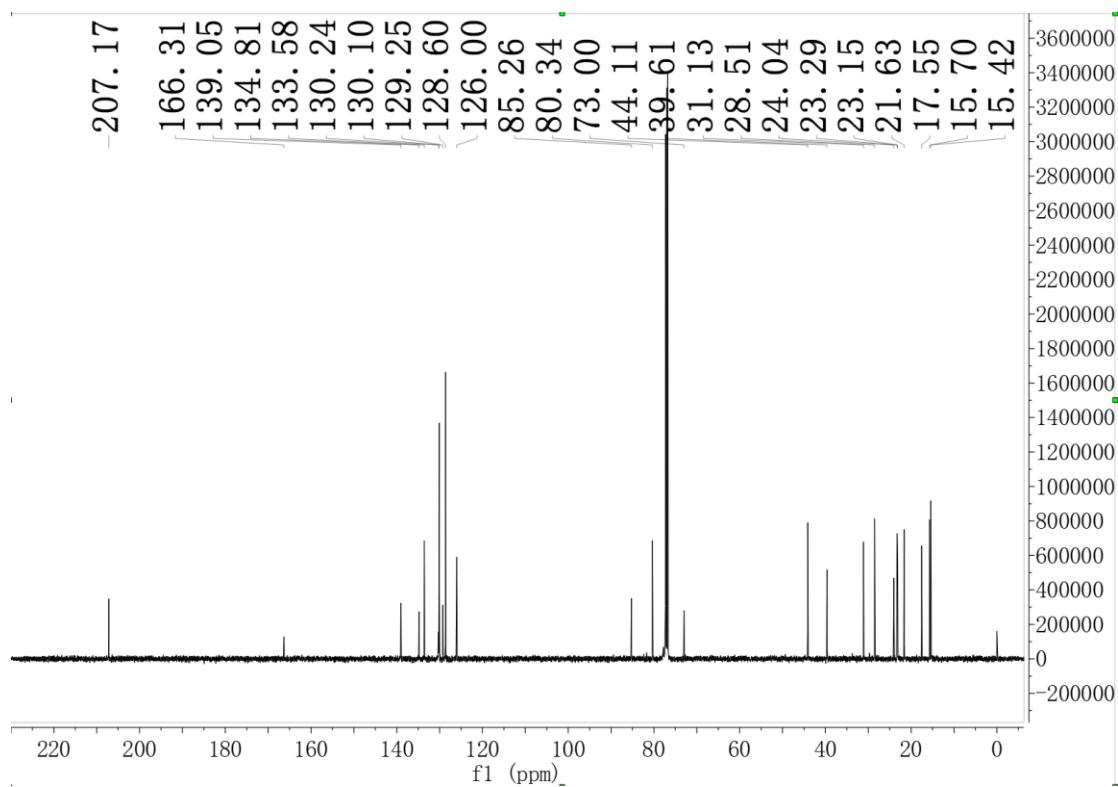

**Figure S15.** <sup>13</sup>C NMR (CDCl<sub>3</sub>) spectrum of compound 3

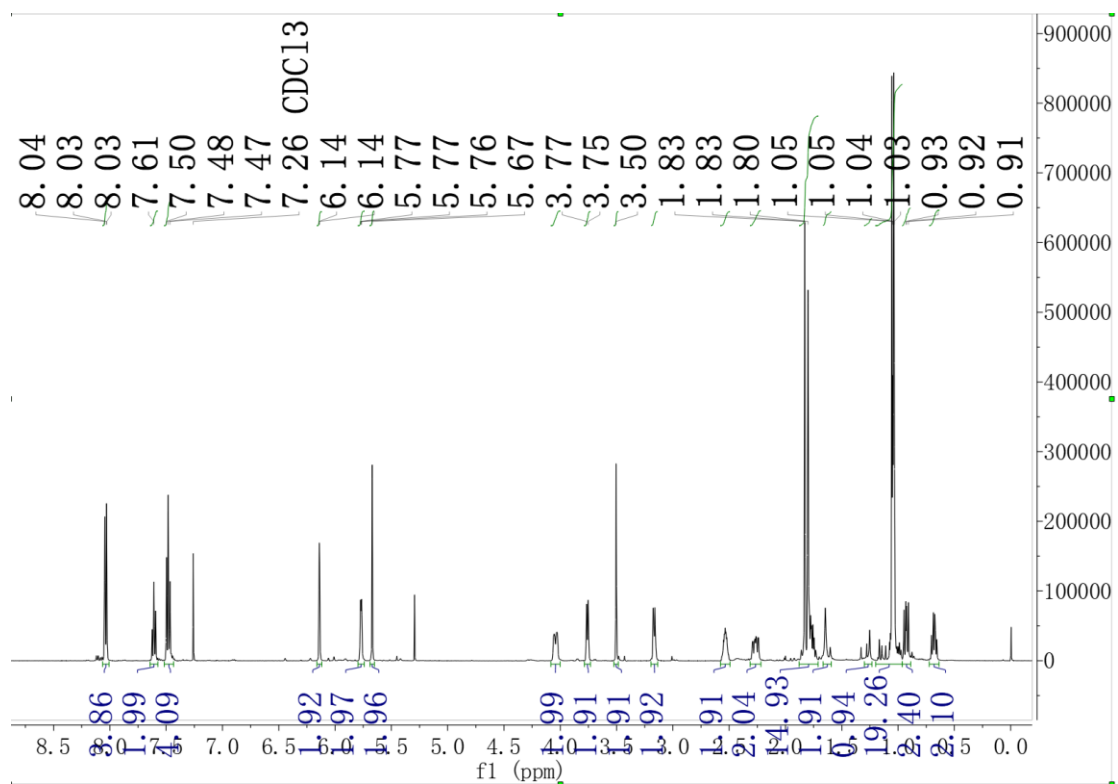

**Figure S16.** <sup>1</sup>H NMR (CDCl<sub>3</sub>) spectrum of compound 4

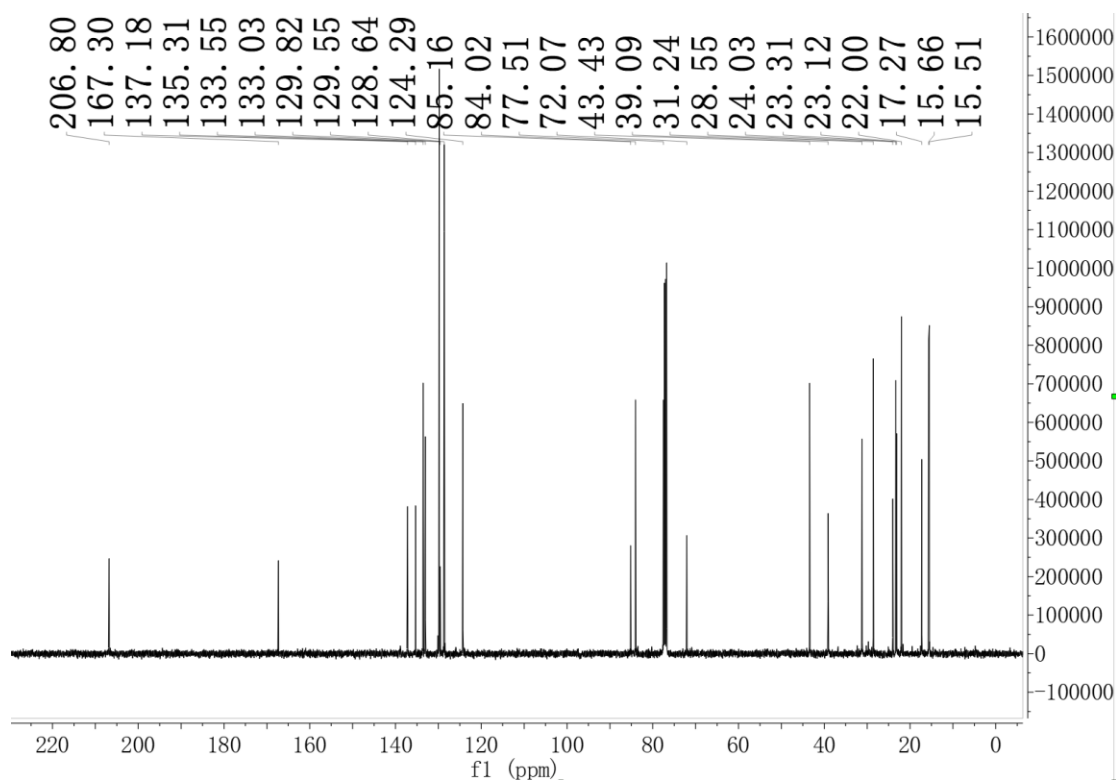

**Figure S17.** <sup>13</sup>C NMR (CDCl<sub>3</sub>) spectrum of compound 4

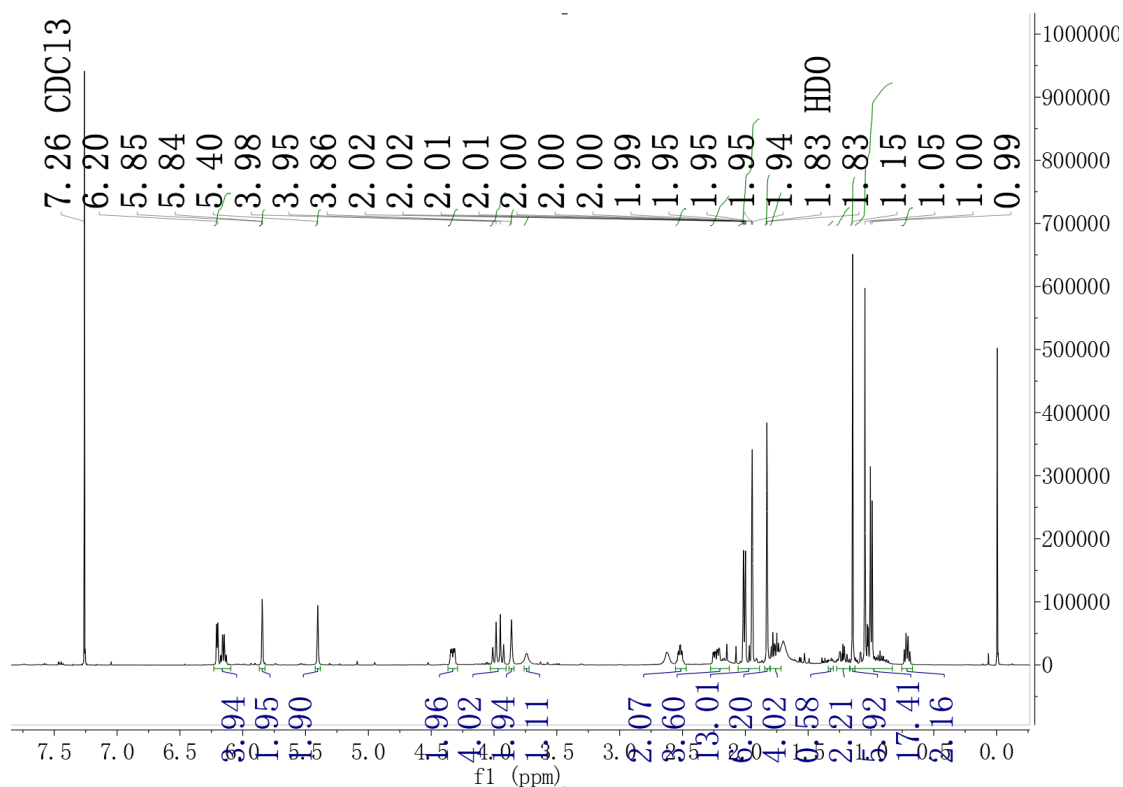

**Figure S18.** <sup>1</sup>H NMR (CDCl<sub>3</sub>) spectrum of compound 5

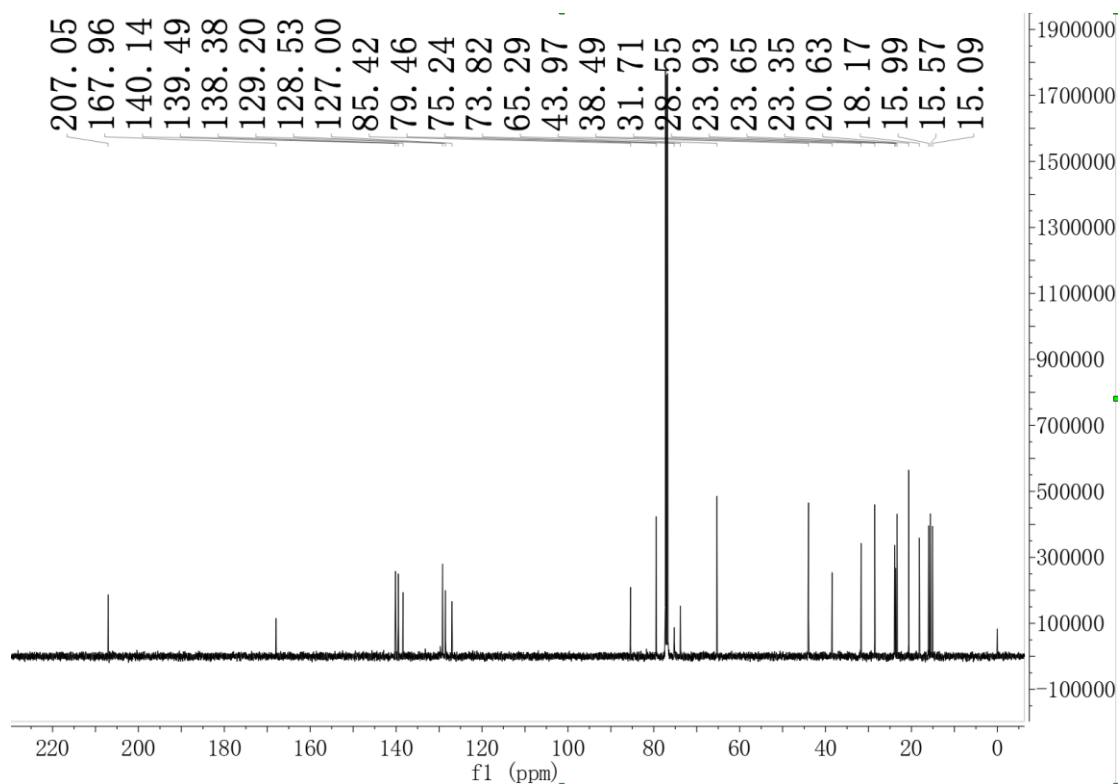

**Figure S19.** <sup>13</sup>C NMR (CDCl<sub>3</sub>) spectrum of compound **5**

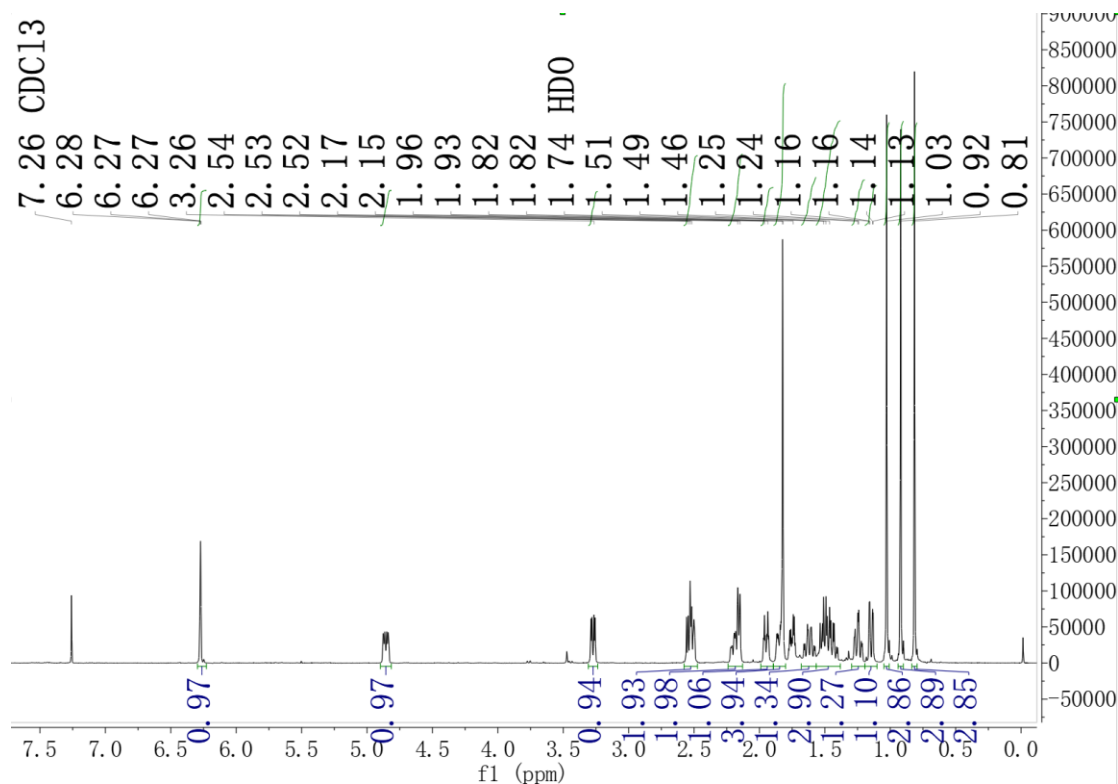

**Figure S20.** <sup>1</sup>H NMR (CDCl<sub>3</sub>) spectrum of compound **6**

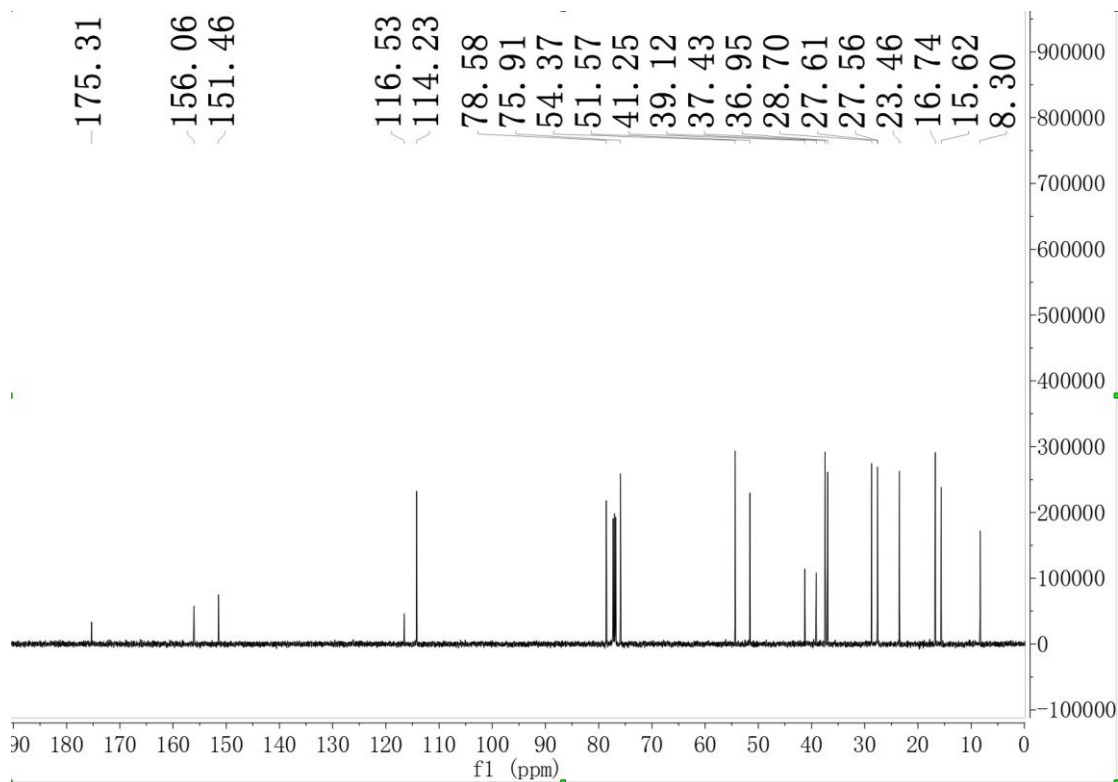

**Figure S21.** <sup>13</sup>C NMR (CDCl<sub>3</sub>) spectrum of compound 6

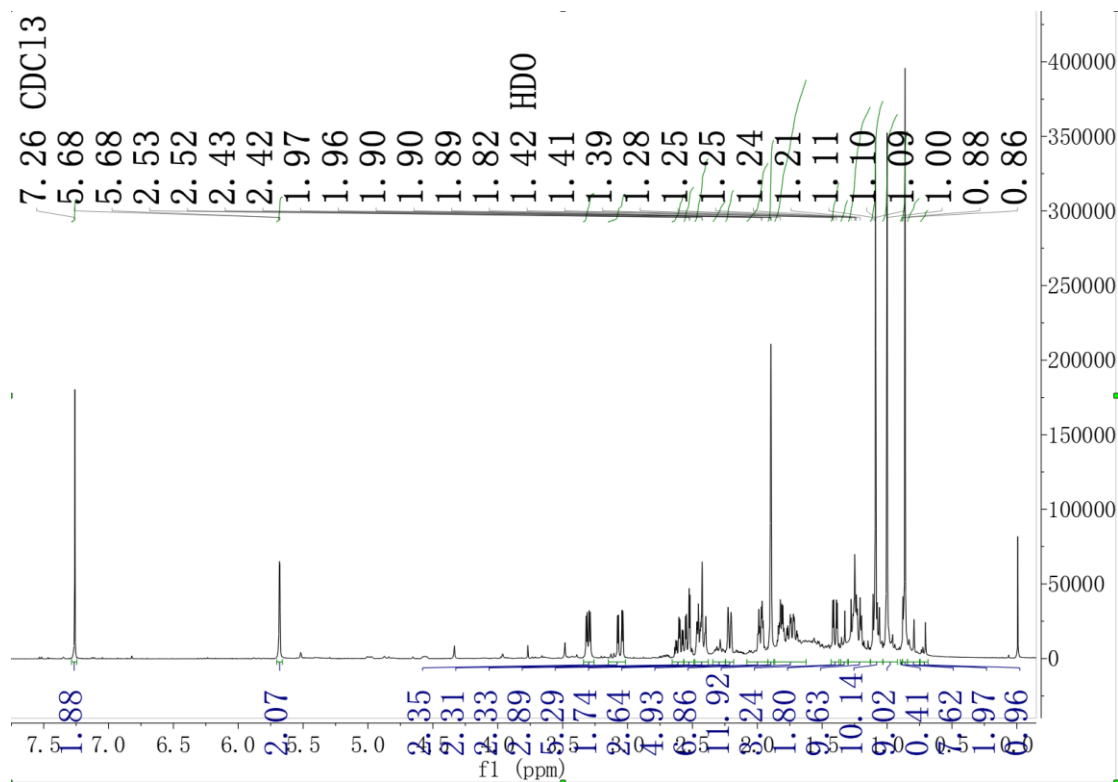

**Figure S22.** <sup>1</sup>H NMR (CDCl<sub>3</sub>) spectrum of compound 7

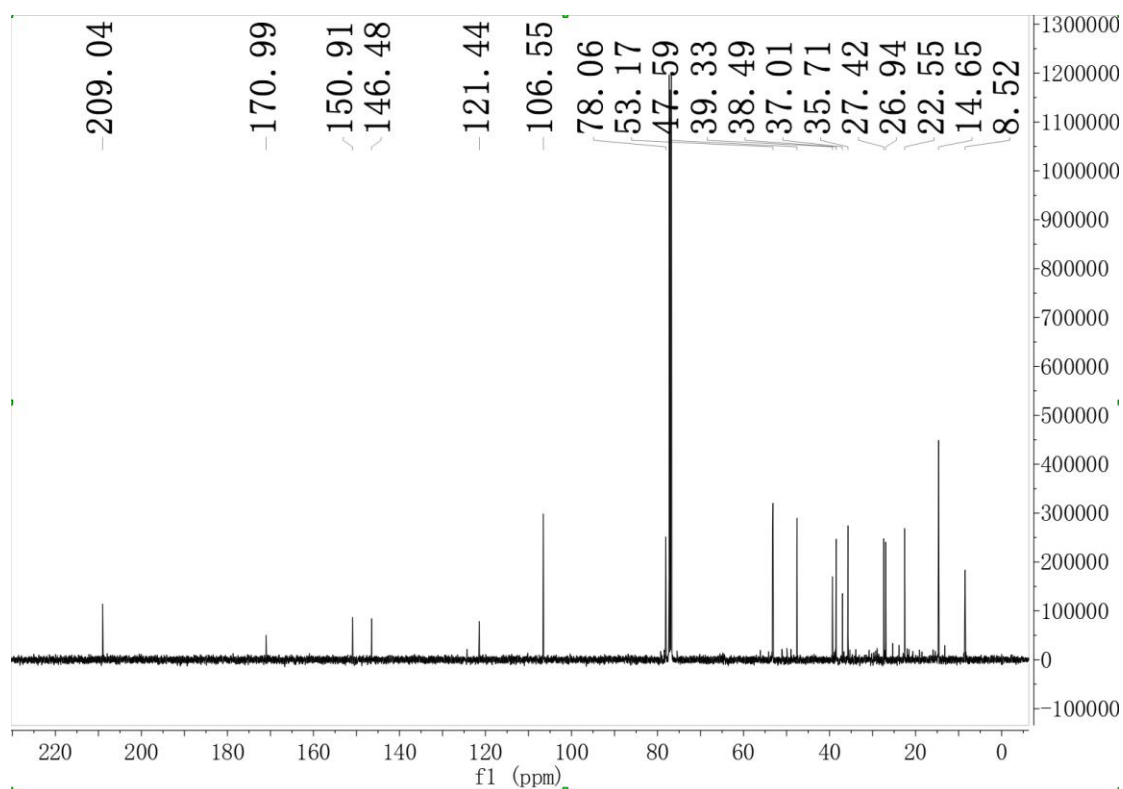

**Figure S23.**  $^{13}\text{C}$  NMR ( $\text{CDCl}_3$ ) spectrum of compound **7**

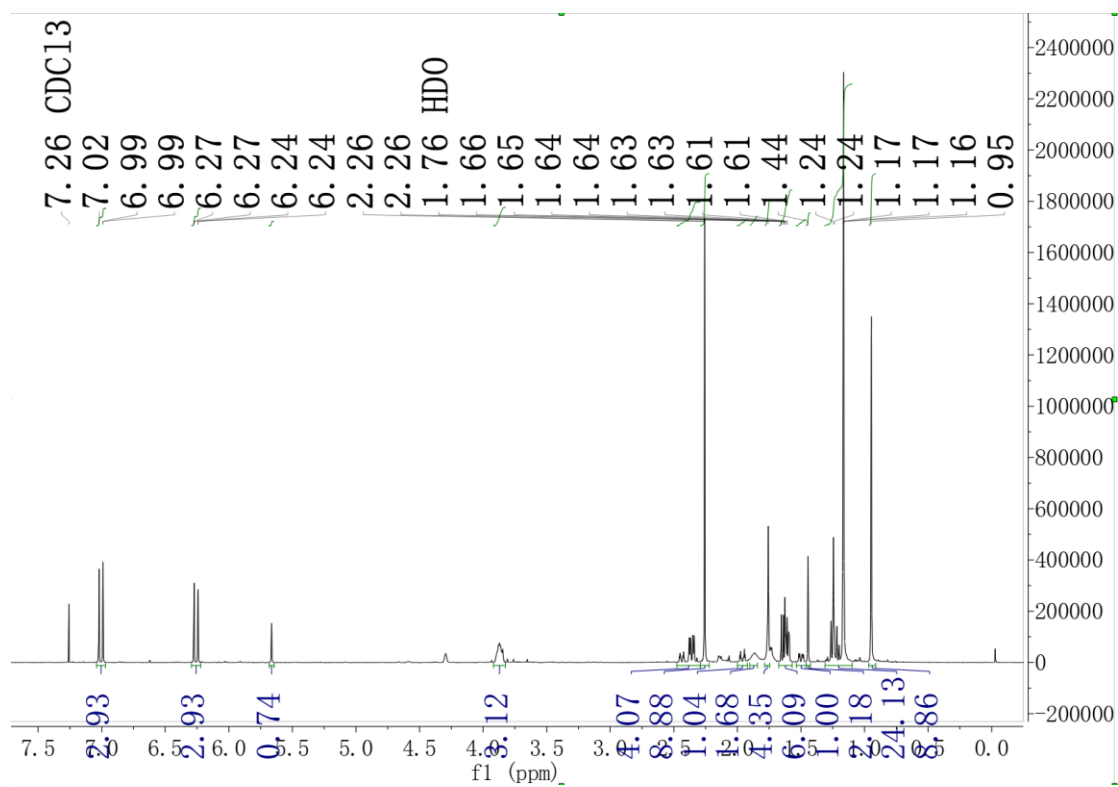

**Figure S24.**  $^1\text{H}$  NMR ( $\text{CDCl}_3$ ) spectrum of compound **8**

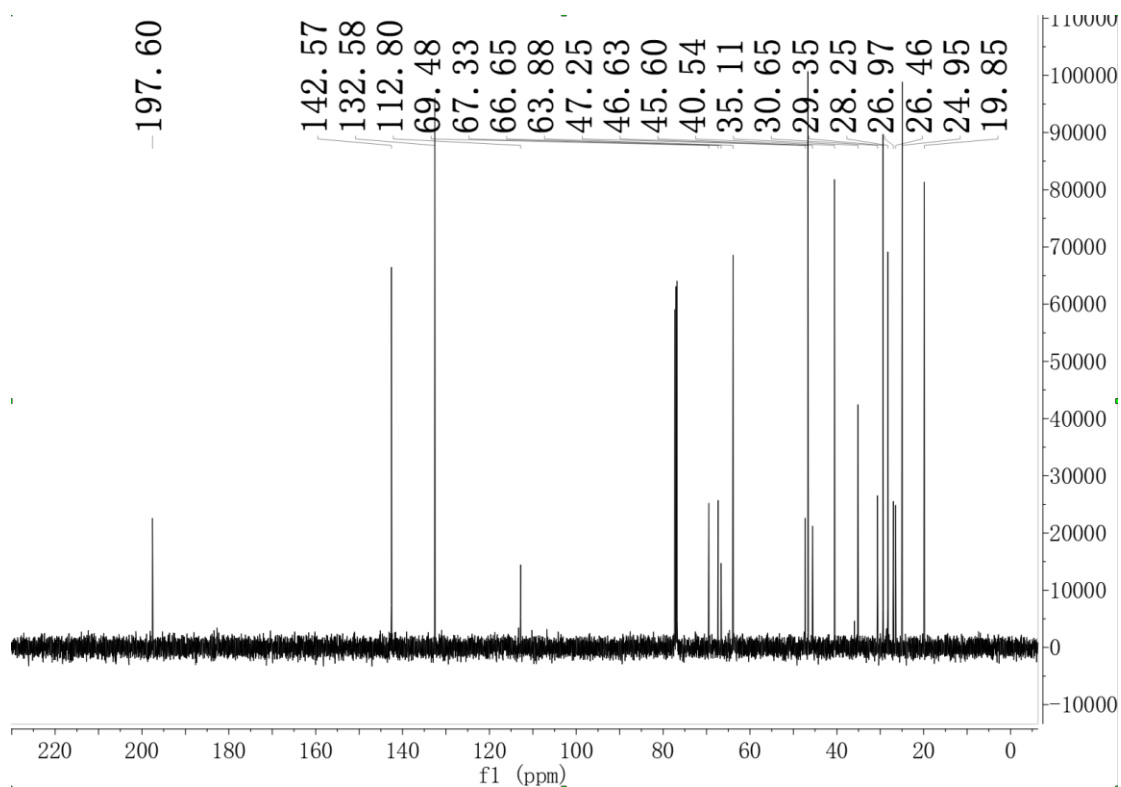

**Figure S25.** <sup>13</sup>C NMR (CDCl<sub>3</sub>) spectrum of compound **8**

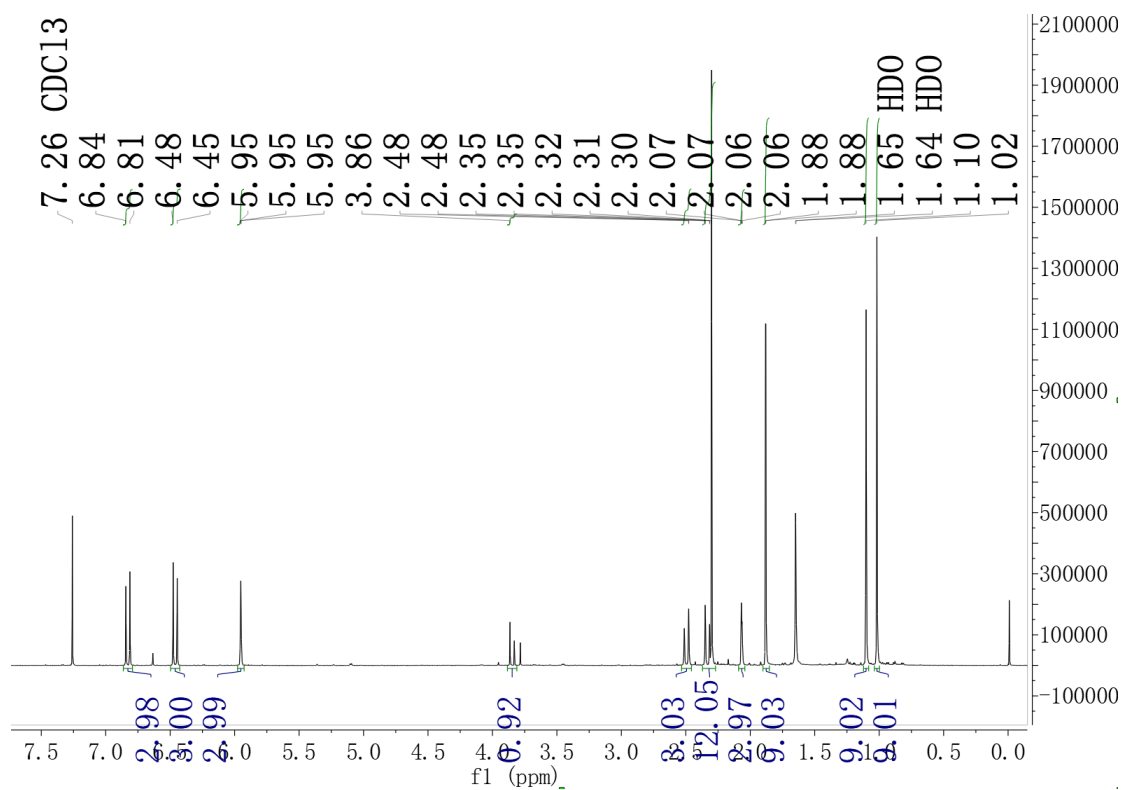

**Figure S26.** <sup>1</sup>H NMR (CDCl<sub>3</sub>) spectrum of compound **9**

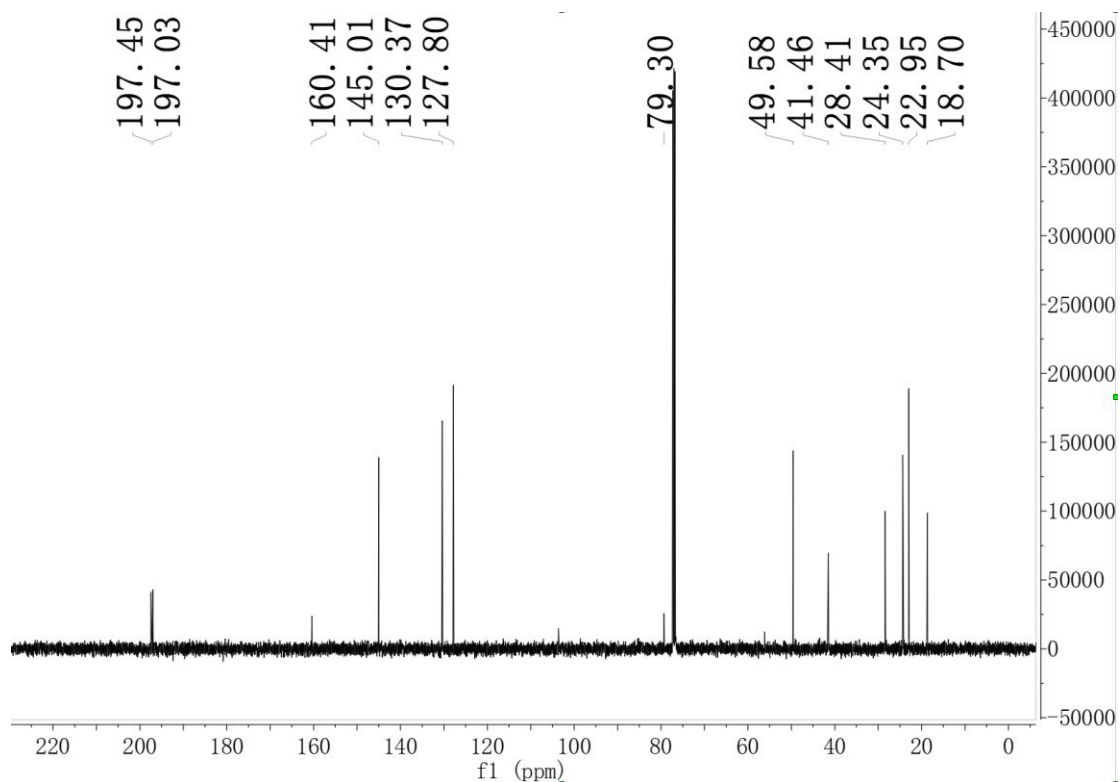

**Figure S27.** <sup>13</sup>C NMR (CDCl<sub>3</sub>) spectrum of compound **9**

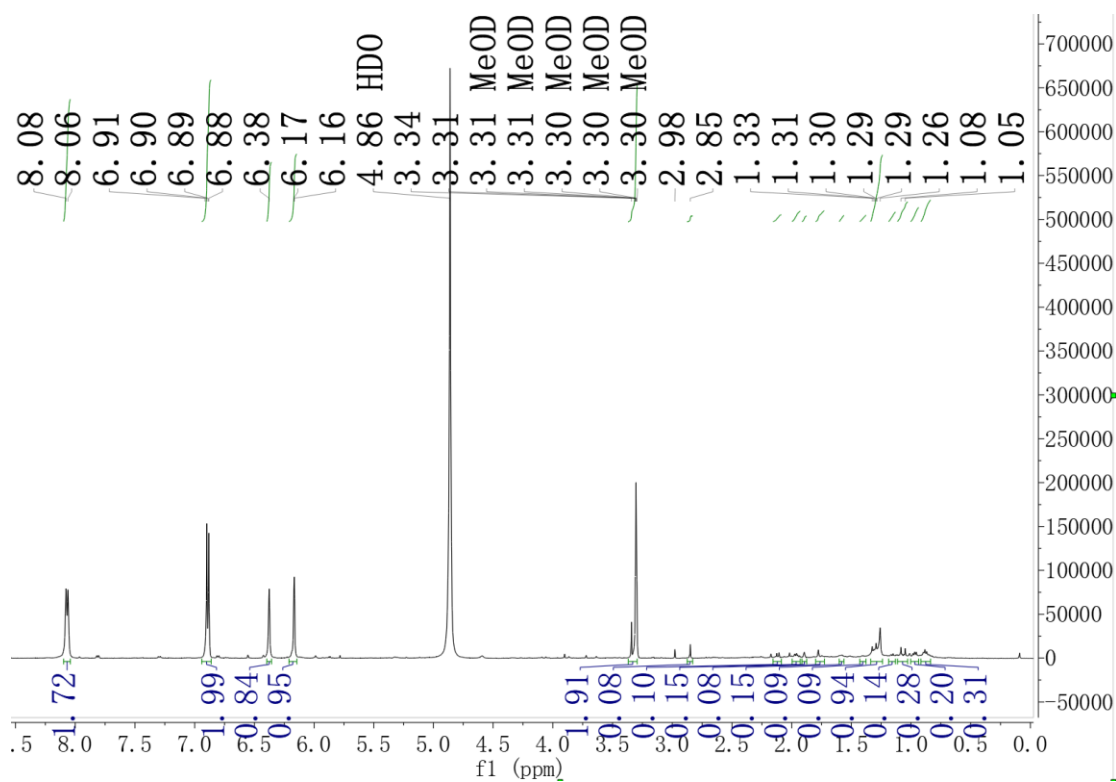

**Figure S28.** <sup>1</sup>H NMR (CD<sub>3</sub>OD) spectrum of compound **10**



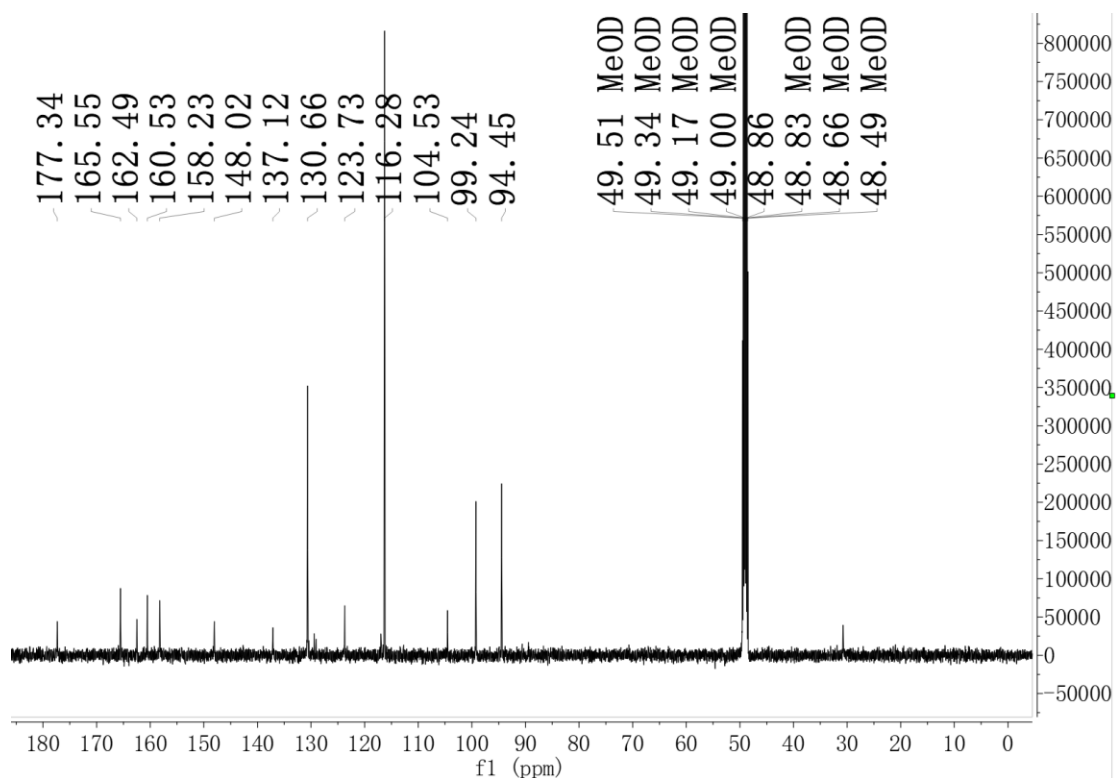

**Figure S29.** <sup>13</sup>C NMR (CD<sub>3</sub>OD) spectrum of compound 10

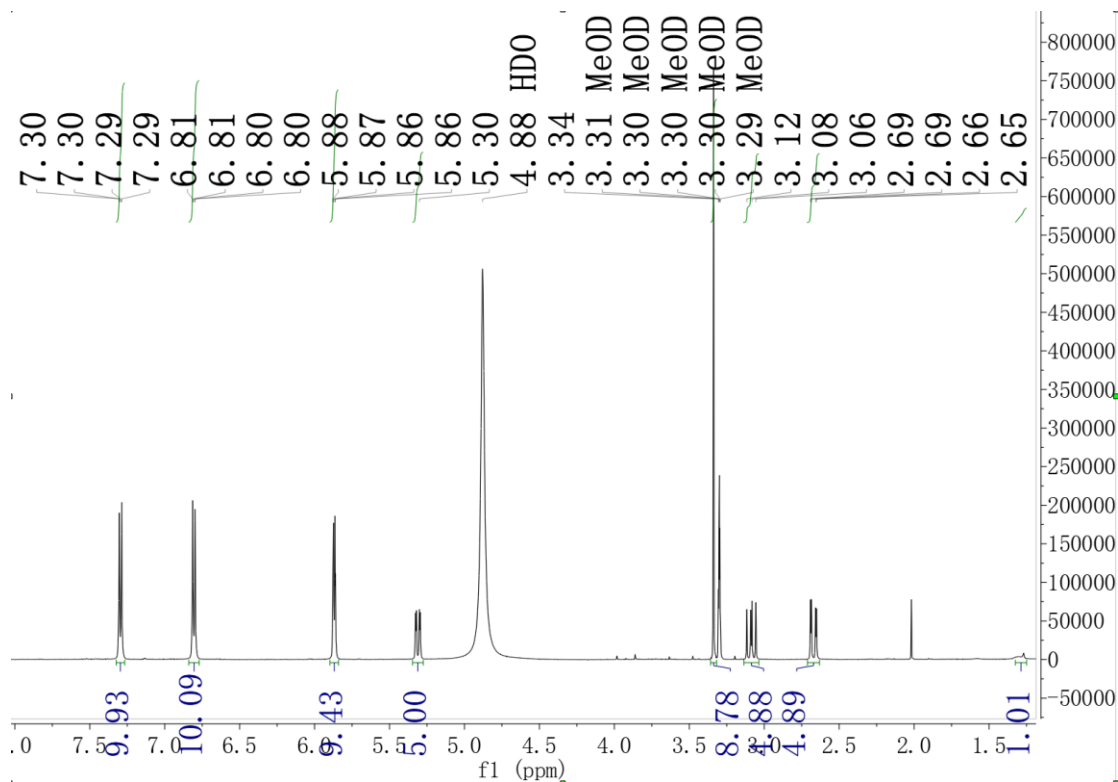

**Figure S30.** <sup>1</sup>H NMR (CD<sub>3</sub>OD) spectrum of compound 11

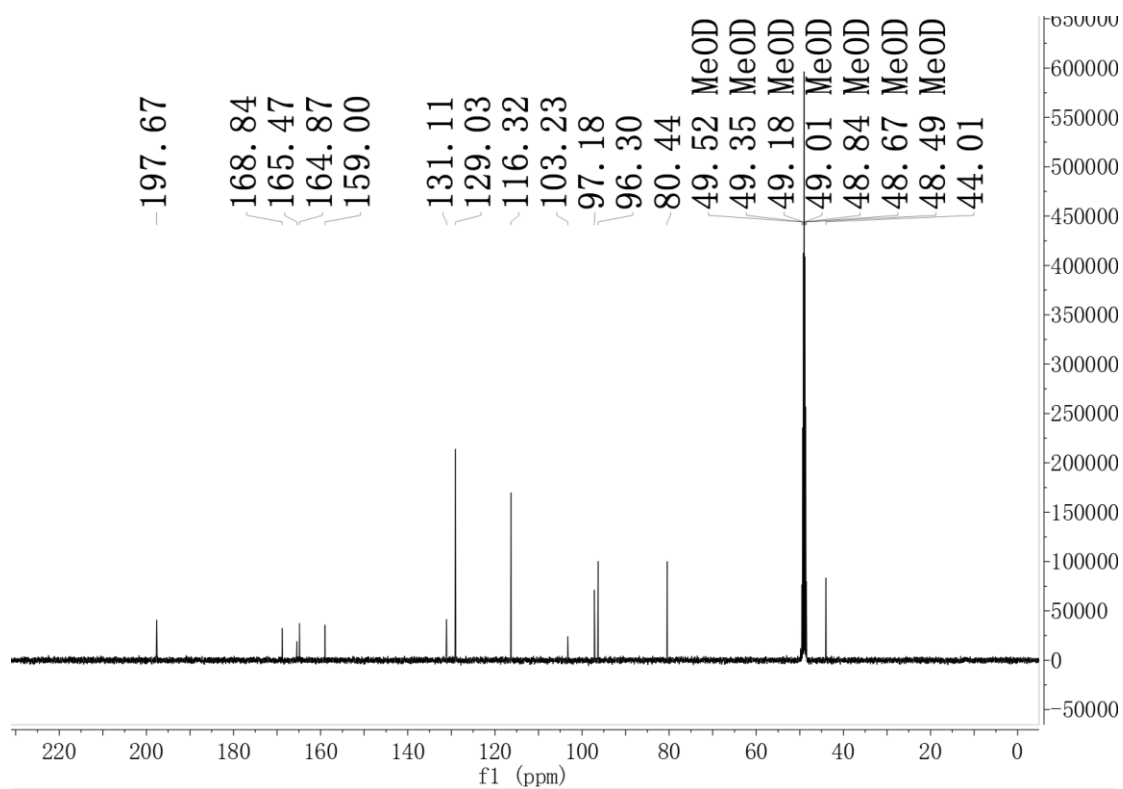

**Figure S31.** <sup>13</sup>C NMR (CD<sub>3</sub>OD) spectrum of compound **11**

**Table S1.** Crystal data and structure refinement for compound **1**

|                                   |                                                |                  |
|-----------------------------------|------------------------------------------------|------------------|
| Identification code               | global                                         |                  |
| Empirical formula                 | C <sub>20</sub> H <sub>30</sub> O <sub>3</sub> |                  |
| Formula weight                    | 318.44                                         |                  |
| Temperature                       | 100(2) K                                       |                  |
| Wavelength                        | 1.54178 Å                                      |                  |
| Crystal system                    | Monoclinic                                     |                  |
| Space group                       | P 1 21 1                                       |                  |
| Unit cell dimensions              | a = 10.0464(12) Å                              | α = 90°.         |
|                                   | b = 9.5021(11) Å                               | β = 112.043(4)°. |
|                                   | c = 10.0557(12) Å                              | γ = 90°.         |
| Volume                            | 889.77(18) Å <sup>3</sup>                      |                  |
| Z                                 | 2                                              |                  |
| Density (calculated)              | 1.189 Mg/m <sup>3</sup>                        |                  |
| Absorption coefficient            | 0.614 mm <sup>-1</sup>                         |                  |
| F(000)                            | 348                                            |                  |
| Crystal size                      | 0.800 x 0.160 x 0.110 mm <sup>3</sup>          |                  |
| Theta range for data collection   | 4.74 to 72.24°.                                |                  |
| Index ranges                      | -12 ≤ h ≤ 12, -10 ≤ k ≤ 11, -12 ≤ l ≤ 12       |                  |
| Reflections collected             | 17575                                          |                  |
| Independent reflections           | 3416 [R(int) = 0.0553]                         |                  |
| Completeness to theta = 72.24°    | 99.7 %                                         |                  |
| Absorption correction             | Semi-empirical from equivalents                |                  |
| Max. and min. transmission        | 0.94 and 0.71                                  |                  |
| Refinement method                 | Full-matrix least-squares on F <sup>2</sup>    |                  |
| Data / restraints / parameters    | 3416 / 1 / 215                                 |                  |
| Goodness-of-fit on F <sup>2</sup> | 1.048                                          |                  |
| Final R indices [I > 2σ(I)]       | R1 = 0.0341, wR2 = 0.0848                      |                  |
| R indices (all data)              | R1 = 0.0359, wR2 = 0.0866                      |                  |
| Absolute structure parameter      | 0.03(9)                                        |                  |
| Largest diff. peak and hole       | 0.155 and -0.167 e.Å <sup>-3</sup>             |                  |

**Table S2.** Cytotoxicity data of compounds **1-11** at the concentration of 40  $\mu$ M.

| Name of<br>compounds | HL-60   |      | A549    |      | SMMC-7721 |      | MCF-7   |      | SW480   |      |
|----------------------|---------|------|---------|------|-----------|------|---------|------|---------|------|
|                      | Average | SD   | Average | SD   | Average   | SD   | Average | SD   | Average | SD   |
| <b>1</b>             | 34.32   | 2.94 | 12.18   | 0.36 | 28.32     | 1.89 | 37.31   | 1.98 | 32.05   | 3.50 |
| <b>2</b>             | 32.71   | 0.90 | 9.03    | 2.86 | 22.76     | 1.96 | 11.86   | 0.72 | 15.19   | 0.62 |
| <b>3</b>             | 22.73   | 2.70 | 27.71   | 1.27 | 19.41     | 2.60 | 22.27   | 0.84 | 14.30   | 2.39 |
| <b>4</b>             | 79.64   | 1.84 | 88.08   | 0.44 | 79.42     | 2.27 | 80.52   | 0.69 | 93.76   | 2.85 |
| <b>5</b>             | 0.00    | 2.46 | 30.24   | 0.93 | 20.66     | 1.47 | 27.13   | 1.80 | 19.78   | 2.09 |
| <b>6</b>             | 15.82   | 2.57 | 6.89    | 0.83 | 1.60      | 2.00 | 0.56    | 2.14 | 8.70    | 1.08 |
| <b>7</b>             | 17.73   | 2.08 | 27.41   | 0.52 | 21.26     | 1.55 | 10.72   | 1.32 | 31.98   | 0.86 |
| <b>8</b>             | 33.57   | 0.90 | 9.98    | 0.59 | 11.38     | 1.66 | 5.32    | 3.11 | 5.78    | 1.78 |
| <b>9</b>             | 12.96   | 2.07 | -0.35   | 1.65 | 3.19      | 0.56 | 3.82    | 1.86 | 3.19    | 3.64 |
| <b>10</b>            | 17.91   | 0.68 | 29.75   | 3.17 | 1.53      | 2.03 | 22.04   | 1.54 | 11.26   | 2.93 |
| <b>11</b>            | 12.46   | 2.96 | 19.71   | 3.98 | 14.40     | 1.35 | 10.02   | 1.56 | 4.97    | 1.72 |
